CORRECTION

# Correction: The changing epidemiological pattern of Dengue in Swat, Khyber Pakhtunkhwa

Jehangir Khan, Abdul Ghaffar, Shujaat Ali Khan

The following information is missing from the Funding section: This study was supported by the National Research and Development Plan of China (No.2016YFC1200500) and 111 project (B12003).

There is an error in the affiliation for the first author. Jehangir Khan is also affiliated with: Key Laboratory of Tropical Diseases and Control of the Ministry of Education, Guangzhou 510080, China.

## Reference

1. Khan J, Ghaffar A, Khan SA (2018) The changing epidemiological pattern of Dengue in Swat, Khyber Pakhtunkhwa. PLoS ONE 13(4): e0195706. <https://doi.org/10.1371/journal.pone.0195706> PMID: [29689060](https://pubmed.ncbi.nlm.nih.gov/29689060/)

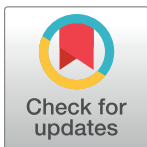

## OPEN ACCESS

**Citation:** Khan J, Ghaffar A, Khan SA (2018) Correction: The changing epidemiological pattern of Dengue in Swat, Khyber Pakhtunkhwa. PLoS ONE 13(9): e0204465. <https://doi.org/10.1371/journal.pone.0204465>

**Published:** September 17, 2018

**Copyright:** © 2018 Khan et al. This is an open access article distributed under the terms of the [Creative Commons Attribution License](https://creativecommons.org/licenses/by/4.0/), which permits unrestricted use, distribution, and reproduction in any medium, provided the original author and source are credited.
